# Supplementary material for: High-sensitivity cardiac troponin I at presentation in patients with suspected acute coronary syndrome: a cohort study
Source: PubMed Central journal article supplement — Lancet. 2015 Dec 19;386(10012):2481–8. doi: 10.1016/S0140-6736(15)00391-8 (PMC4765710; doi:10.1016/s0140-6736(15)00391-8), 2015-12-19

# THE LANCET

## **Supplementary appendix**

This appendix formed part of the original submission and has been peer reviewed. We post it as supplied by the authors.

Supplement to: Shah ASV, Anand A, Sandoval Y, et al, on behalf of the High-STEACS investigators. High-sensitivity cardiac troponin I at presentation in patients with suspected acute coronary syndrome: a cohort study. *Lancet* 2015; published online Oct 8. [http://dx.doi.org/10.1016/S0140-6736\(15\)00391-8](http://dx.doi.org/10.1016/S0140-6736(15)00391-8).

## **High-sensitivity cardiac troponin I at presentation in patients with suspected acute coronary syndrome**

Anoop SV Shah MD,<sup>1\*</sup> Atul Anand MD,<sup>1\*</sup> Yader Sandoval MD,<sup>2</sup> Kuan Ken Lee MD,<sup>1</sup> Stephen W Smith MD,<sup>3</sup> Philip D Adamson MD,<sup>1</sup> Andrew Chapman MD,<sup>1</sup> Timothy Langdon MD,<sup>1</sup> Dennis Sandeman MSc,<sup>1</sup> Amar Vaswani MD,<sup>1</sup> Fiona E Strachan PhD,<sup>1</sup> Amy Ferry BSc,<sup>1</sup> Alexandra Stirzaker MD<sup>1</sup>, Alan Reid MSc<sup>4</sup>, Alasdair J Gray MD,<sup>5</sup> Paul O Collinson MD,<sup>6</sup> David A McAllister MD,<sup>7</sup> Fred S Apple PhD<sup>8</sup>, David E Newby MD,<sup>1</sup> and Nicholas L Mills MD<sup>1</sup>  
*on behalf of the High STEACS Investigators*

\*Contributed equally

<sup>1</sup>*BHF Centre for Cardiovascular Science, University of Edinburgh, Edinburgh, United Kingdom*

<sup>2</sup>*Division of Cardiology, Department of Medicine, Hennepin County Medical Centre, Minneapolis, USA*

<sup>3</sup>*Department of Emergency Medicine, Hennepin County Medical Centre, Minneapolis, USA*

<sup>4</sup>*Department of Biochemistry, Queen Elizabeth University Hospital, Glasgow, United Kingdom*

<sup>5</sup>*Department of Emergency Medicine, Royal Infirmary of Edinburgh, Edinburgh, United Kingdom*

<sup>6</sup>*Division of Clinical Sciences, St George's, University of London, London, United Kingdom*

<sup>7</sup>*Centre for Population Health Sciences, University of Edinburgh, Edinburgh, United Kingdom*

<sup>8</sup>*Department of Laboratory Medicine and Pathology, University of Minnesota, USA*

### **Correspondence and requests for reprints:**

Dr Anoop Shah,  
BHF/University Centre for Cardiovascular Science,  
SU.305 Chancellor's Building,  
University of Edinburgh,  
Edinburgh EH16 4SB  
United Kingdom  
Tel: +44 131 242 6432  
Fax: +44 131 242 6379  
E-mail: [Anoop.Shah@ed.ac.uk](mailto:Anoop.Shah@ed.ac.uk)

**Support:** British Heart Foundation Project Grants (SP/12/10/29922 and PG/15/51/31596), Intermediate Clinical Research Fellowship (FS/10/024/28266) and Chair Award (CH/09/002); Chief Scientist Office Health Informatics Grant from the Scottish Government (HICG/1/40)

**Table S1. Baseline characteristics of patients in the validation cohort (internal)**

|                                                                                                          | All patients<br>(n=1,126) | <99 <sup>th</sup> centile at presentation<br>(n=829)* |
|----------------------------------------------------------------------------------------------------------|---------------------------|-------------------------------------------------------|
| Sex (female), n (%)                                                                                      | 504 (45)                  | 355 (43)                                              |
| Age, years                                                                                               | 66 (16)                   | 63 (16)                                               |
| Smoker, n (%)                                                                                            | 277 (27)                  | 208 (27)                                              |
| <b>Past medical history</b>                                                                              |                           |                                                       |
| Diabetes mellitus, n (%)                                                                                 | 184 (16)                  | 121 (15)                                              |
| Hypertension, n (%)                                                                                      | 596 (53)                  | 420 (51)                                              |
| Hyperlipidaemia, n (%)                                                                                   | 503 (45)                  | 375 (45)                                              |
| Cerebrovascular accident, n (%)                                                                          | 93 (8)                    | 61 (7)                                                |
| Myocardial infarction, n (%)                                                                             | 292 (26)                  | 211 (26)                                              |
| Ischaemic heart disease, n (%)                                                                           | 466 (42)                  | 344 (42)                                              |
| <b>Previous revascularisation</b>                                                                        |                           |                                                       |
| Percutaneous coronary intervention, n (%)                                                                | 166 (15)                  | 139 (17)                                              |
| Coronary artery bypass grafting, n (%)                                                                   | 86 (8)                    | 62 (8)                                                |
| <b>Haematology and biochemistry</b>                                                                      |                           |                                                       |
| Haemoglobin, g/dL                                                                                        | 134 (35)                  | 136 (38)                                              |
| Creatinine, mmol/L                                                                                       | 87 (53)                   | 78 (23)                                               |
| Urea, mmol/L                                                                                             | 7 (5)                     | 6 (4)                                                 |
| Cholesterol, mmol/L                                                                                      | 4 (1)                     | 5 (1)                                                 |
| <b>Admission drugs</b>                                                                                   |                           |                                                       |
| Aspirin, n (%)                                                                                           | 432 (39)                  | 312 (38)                                              |
| Clopidogrel, n (%)                                                                                       | 133 (12)                  | 104 (13)                                              |
| Beta-blockers, n (%)                                                                                     | 319 (29)                  | 216 (27)                                              |
| ACE-inhibitor or ARB, n (%)                                                                              | 366 (33)                  | 254 (31)                                              |
| Statin, n (%)                                                                                            | 469 (42)                  | 343 (42)                                              |
| <b>Presentation observations</b>                                                                         |                           |                                                       |
| Systolic blood pressure, mmHg                                                                            | 135 (25)                  | 135 (24)                                              |
| Diastolic blood pressure, mmHg                                                                           | 73 (15)                   | 72 (15)                                               |
| Heart rate, beats per min                                                                                | 80 (21)                   | 78 (18)                                               |
| <b>Electrocardiography</b>                                                                               |                           |                                                       |
| ST-segment elevation, n (%)                                                                              | 118 (11)                  | 48 (6)                                                |
| ST-segment depression, n (%)                                                                             | 106 (10)                  | 46 (6)                                                |
| T-wave inversion, n (%)                                                                                  | 221 (20)                  | 150 (19)                                              |
| <b>Outcome at 30 days</b>                                                                                |                           |                                                       |
| Composite of index type 1 myocardial infarction, recurrent myocardial infarction or cardiac death, n (%) | 256 (23)                  | 49 (6)                                                |

Vales are number (%) or mean (SD) or median (inter-quartile range)

Abbreviations: ACE = angiotensin converting enzyme; ARB = angiotensin receptor blockers

\*Excludes patients presenting with ST-segment elevation myocardial infarction

**Table S2. Baseline characteristics of patients in the validation cohort (external)**

|                                           | <b>All patients</b> | <b>&lt;99<sup>th</sup> centile at presentation</b> |
|-------------------------------------------|---------------------|----------------------------------------------------|
|                                           | (n=308)             | (n=232)                                            |
| Sex (female), n (%)                       | 148 (48)            | 101 (44)                                           |
| Age, years                                | 58 (15)             | 56 (15)                                            |
| Smoker, n (%)                             | 106 (34)            | 85 (37)                                            |
| <b>Past medical history</b>               |                     |                                                    |
| Diabetes mellitus, n (%)                  | 77 (25)             | 46 (20)                                            |
| Hyperlipidaemia, n (%)                    | 148 (48)            | 102 (44)                                           |
| Cerebrovascular accident, n (%)           | 38 (12)             | 27 (12)                                            |
| Myocardial infarction, n (%)              | 37 (12)             | 24 (10)                                            |
| Ischaemic heart disease, n (%)            | 49 (16)             | 30 (13)                                            |
| <b>Previous revascularisation</b>         |                     |                                                    |
| Percutaneous coronary intervention, n (%) | 28 (9)              | 19 (8)                                             |
| Coronary artery bypass grafting, n (%)    | 15 (5)              | 5 (2)                                              |
| <b>Admission drugs</b>                    |                     |                                                    |
| Aspirin, n (%)                            | 163 (53)            | 119 (51)                                           |
| Clopidogrel, n (%)                        | 30 (10)             | 20 (9)                                             |
| <b>Presentation observations</b>          |                     |                                                    |
| Systolic blood pressure, mmHg             | 143 (32)            | 140 (26)                                           |
| Diastolic blood pressure, mmHg            | 82 (22)             | 82 (20)                                            |
| Heart rate, beats per min                 | 89 (25)             | 89 (25)                                            |
| <b>Electrocardiography</b>                |                     |                                                    |
| ST-segment elevation, n (%)               | 32 (10)             | 24 (10)                                            |
| ST-segment depression, n (%)              | 23 (8)              | 15 (6)                                             |
| T-wave inversion, n (%)                   | 36 (12)             | 23 (10)                                            |

**Table S3. Two-by-two tables for the derivation and validation cohorts**

|                                              |            | <i>Primary outcome</i> |           |
|----------------------------------------------|------------|------------------------|-----------|
|                                              |            | <b>Yes</b>             | <b>No</b> |
| <b>Derivation cohort (n=3,799)</b>           |            |                        |           |
| <i>Troponin I on presentation &lt;5 ng/L</i> | <b>Yes</b> | 9                      | 2,302     |
|                                              | <b>No</b>  | 136                    | 1,352     |
| <br><b>Validation cohorts (n=1,061)</b>      |            |                        |           |
| <i>Troponin I on presentation &lt;5 ng/L</i> | <b>Yes</b> | 3                      | 590       |
|                                              | <b>No</b>  | 50                     | 417       |

**Table S4. Patients with troponin concentration <5 ng/L meeting the primary endpoint in the derivation cohort**

| Age | Gender | Peak troponin (ng/L) | Presenting symptom | Time to initial troponin (hrs) | Diagnosis | Risk factors                                                          | Initial ECG                                         | Management                            |
|-----|--------|----------------------|--------------------|--------------------------------|-----------|-----------------------------------------------------------------------|-----------------------------------------------------|---------------------------------------|
| 64  | Male   | 850                  | Chest pain         | 1                              | NSTEMI    | Previous MI and PCI<br>Hyperlipidaemia<br>Ex-smoker                   | Inferior ST-segment depression and T-wave inversion | PCI to RCA and LAD                    |
| 70  | Female | 70                   | Chest pain         | 12                             | NSTEMI    | Hypertension<br>Hyperlipidaemia                                       | Anterior ST-segment depression                      | PCI to LAD                            |
| 48  | Female | 6,480                | Chest pain         | 1                              | NSTEMI    | Previous MI<br>Smoker<br>Hyperlipidaemia                              | Anterolateral T-wave inversion (old)                | PCI to RCA                            |
| 80  | Male   | 534                  | Chest pain         | 1                              | NSTEMI    | Angina pectoris<br>Hypertension                                       | Sinus rhythm                                        | Medical                               |
| 62  | Male   | 78                   | Chest pain         | 2                              | NSTEMI    | Hypertension<br>Diabetes mellitus<br>Hyperlipidaemia<br>PVD<br>Smoker | Sinus rhythm                                        | PCI to RCA                            |
| 69  | Female | 852                  | Chest pain         | 2                              | NSTEMI    | Previous PCI<br>Hypertension<br>Ex-smoker                             | Sinus rhythm                                        | Medical                               |
| 69  | Female | 17                   | Chest pain         | 3                              | Vasospasm | Previous MI and PCI                                                   | Sinus rhythm                                        | Medical                               |
| 44  | Male   | 14,008               | Chest pain         | 1                              | NSTEMI    | Hyperlipidaemia<br>Family history of CHD<br>Smoker                    | ST-segment elevation                                | Medical, occluded intermediate artery |
| 56  | Female | 3,689                | Chest pain         | 3                              | NSTEMI    | Family history of CHD                                                 | Lateral T-wave inversion                            | PCI to LAD and circumflex             |

CHD = coronary heart disease; LAD = left anterior descending; MI = myocardial infarction; NSTEMI = non-ST-segment elevation myocardial infarction; PCI = percutaneous coronary intervention; PVD = peripheral vascular disease; RCA = right coronary artery

**Table S5. Patients with troponin concentration <5 ng/L meeting the primary endpoint in the validation cohorts**

| <b>Age</b> | <b>Gender</b> | <b>Peak troponin (ng/L)</b> | <b>Presenting symptom</b> | <b>Time to initial troponin (hrs)</b> | <b>Diagnosis</b> | <b>Risk factors</b>                                                   | <b>Initial ECG</b>                                       | <b>Management</b>                               |
|------------|---------------|-----------------------------|---------------------------|---------------------------------------|------------------|-----------------------------------------------------------------------|----------------------------------------------------------|-------------------------------------------------|
| 61         | Male          | 1                           | Cardiac arrest            | 1                                     | Cardiac arrest   | None                                                                  | Pulseless electrical activity                            | None; patient died at presentation              |
| 47         | Male          | 3                           | Cardiac arrest            | 1                                     | Cardiac arrest   | None                                                                  | Pulseless electrical activity                            | None; patient died at presentation              |
| 76         | Male          | 1,094                       | Chest pain                | 8                                     | NSTEMI           | Hypertension<br>Hyperlipidaemia<br>Diabetes mellitus<br>Previous CABG | Atrial fibrillation, inferolateral ST-segment depression | Medical; patent bypass grafts with occluded LAD |

CABG = coronary artery bypass grafting; LAD = left anterior descending; NSTEMI = non-ST-segment elevation myocardial infarction;

**Table S6. Baseline characteristics of patients with suspected acute coronary syndrome and troponin concentrations <5 ng/L and 5 ng/L to 99<sup>th</sup> centile**

|                                           | Troponin concentration     |                                                       |
|-------------------------------------------|----------------------------|-------------------------------------------------------|
|                                           | <5 ng/L<br><i>n</i> =2,160 | 5 ng/L to 99 <sup>th</sup> centile<br><i>n</i> =1,453 |
| Age, years                                | 56 (15)                    | 69 (14)                                               |
| Sex (female), n (%)                       | 1,012 (47)                 | 502 (35)                                              |
| <b>Presenting complaint</b>               |                            |                                                       |
| Chest pain, n (%)                         | 1,919 (89)                 | 1,177 (81)                                            |
| Dyspnoea, n (%)                           | 50 (2)                     | 83 (6)                                                |
| Palpitations, n (%)                       | 61 (3)                     | 35 (2)                                                |
| Syncope, n (%)                            | 52 (3)                     | 78 (5)                                                |
| Other, n (%)                              | 78 (4)                     | 80 (6)                                                |
| <b>Time since onset of chest pain</b>     |                            |                                                       |
| <2 hours, n (%)                           | 228 (11)                   | 254 (16)                                              |
| <b>Past medical history</b>               |                            |                                                       |
| Diabetes mellitus, n (%)                  | 227 (12)                   | 250 (20)                                              |
| Hypertension, n (%)                       | 460 (25)                   | 493 (39)                                              |
| Hyperlipidaemia, n (%)                    | 412 (22)                   | 378 (30)                                              |
| Cerebrovascular accident, n (%)           | 91 (5)                     | 129 (10)                                              |
| Myocardial infarction, n (%)              | 229 (12)                   | 318 (25)                                              |
| Ischaemic heart disease, n (%)            | 402 (22)                   | 571 (45)                                              |
| <b>Previous revascularisation</b>         |                            |                                                       |
| Percutaneous coronary intervention, n (%) | 150 (8)                    | 178 (14)                                              |
| Coronary artery bypass grafting, n (%)    | 35 (2)                     | 113 (9)                                               |
| <b>Admission drugs</b>                    |                            |                                                       |
| Statin, n (%)                             | 393 (29)                   | 417 (47)                                              |
| Aspirin, n (%)                            | 286 (21)                   | 372 (42)                                              |
| Clopidogrel, n (%)                        | 108 (8)                    | 114 (13)                                              |
| ACE/ARB, n (%)                            | 329 (24)                   | 353 (40)                                              |
| Beta-blockers, n (%)                      | 234 (17)                   | 297 (34)                                              |
| Oral anticoagulant, n (%)                 | 39 (3)                     | 108 (12)                                              |
| <b>Electrocardiogram</b>                  |                            |                                                       |
| Bundle branch block, n (%)                | 67 (4)                     | 143 (12)                                              |
| ST elevation, n (%)                       | 40 (2)                     | 40 (3)                                                |
| ST depression, n (%)                      | 45 (2)                     | 68 (6)                                                |
| T-wave inversion, n (%)                   | 156 (7)                    | 158 (11)                                              |
| <b>Presentation observations</b>          |                            |                                                       |
| Heart rate, bpm                           | 79 (19)                    | 81 (23)                                               |
| Systolic blood pressure, mmHg             | 138 (24)                   | 138 (27)                                              |



**Figure S1. Flow diagram to illustrate study population in the derivation cohort**

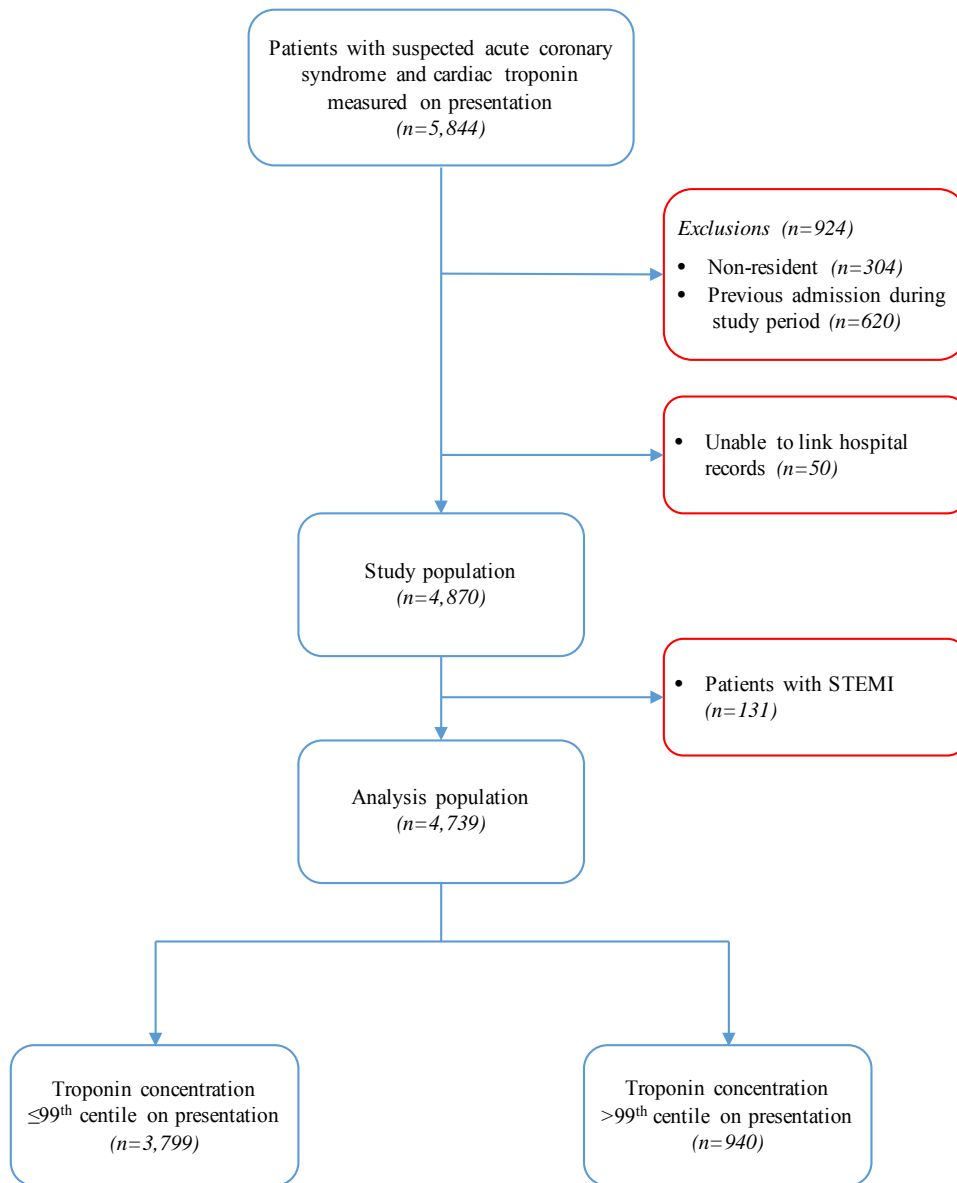

**Figure S2. Coefficient of variation derived from United Kingdom-National External Quality Assurance Scheme (UK-NEQAS) inter-laboratory reporting**

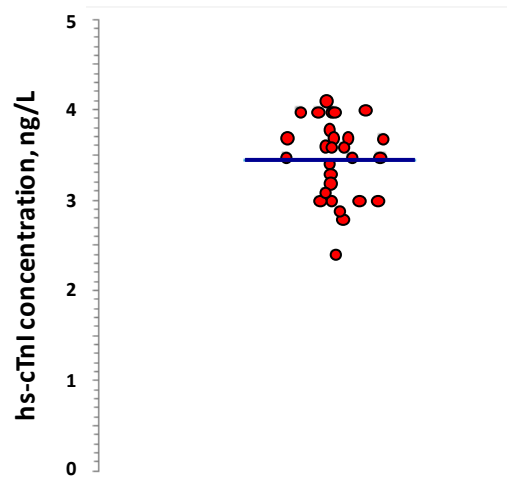

| Precision analysis | n  | Mean | Mean SE | Variance | SD   | %CV   |
|--------------------|----|------|---------|----------|------|-------|
| Pooled             | 33 | 3.45 | 0.076   | 0.19     | 0.44 | 12.6% |

**Figure S3. Cumulative percentage of patients stratified by time of onset of symptoms in the derivation cohort**

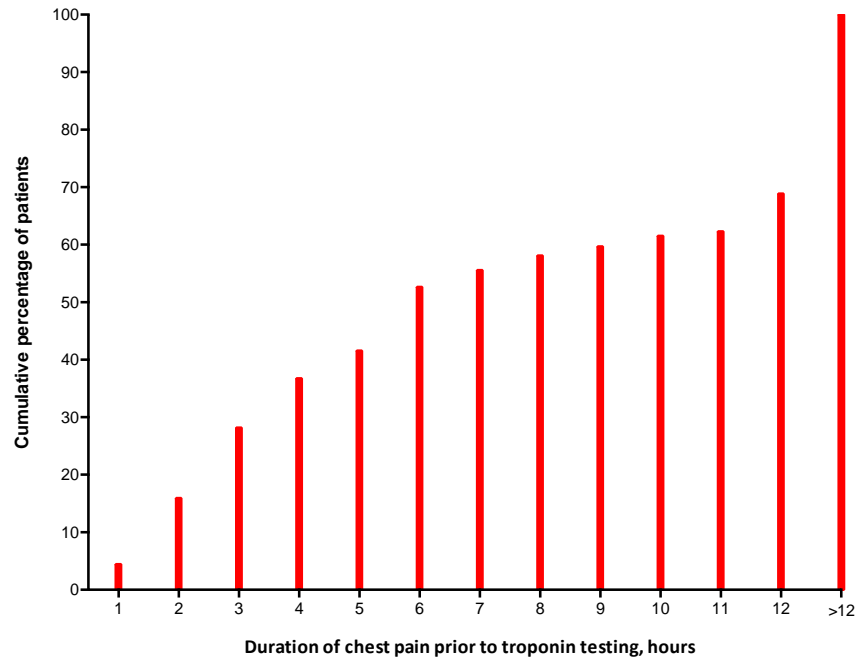

**Figure S4. Histogram of time from presentation to troponin testing in the derivation cohort**

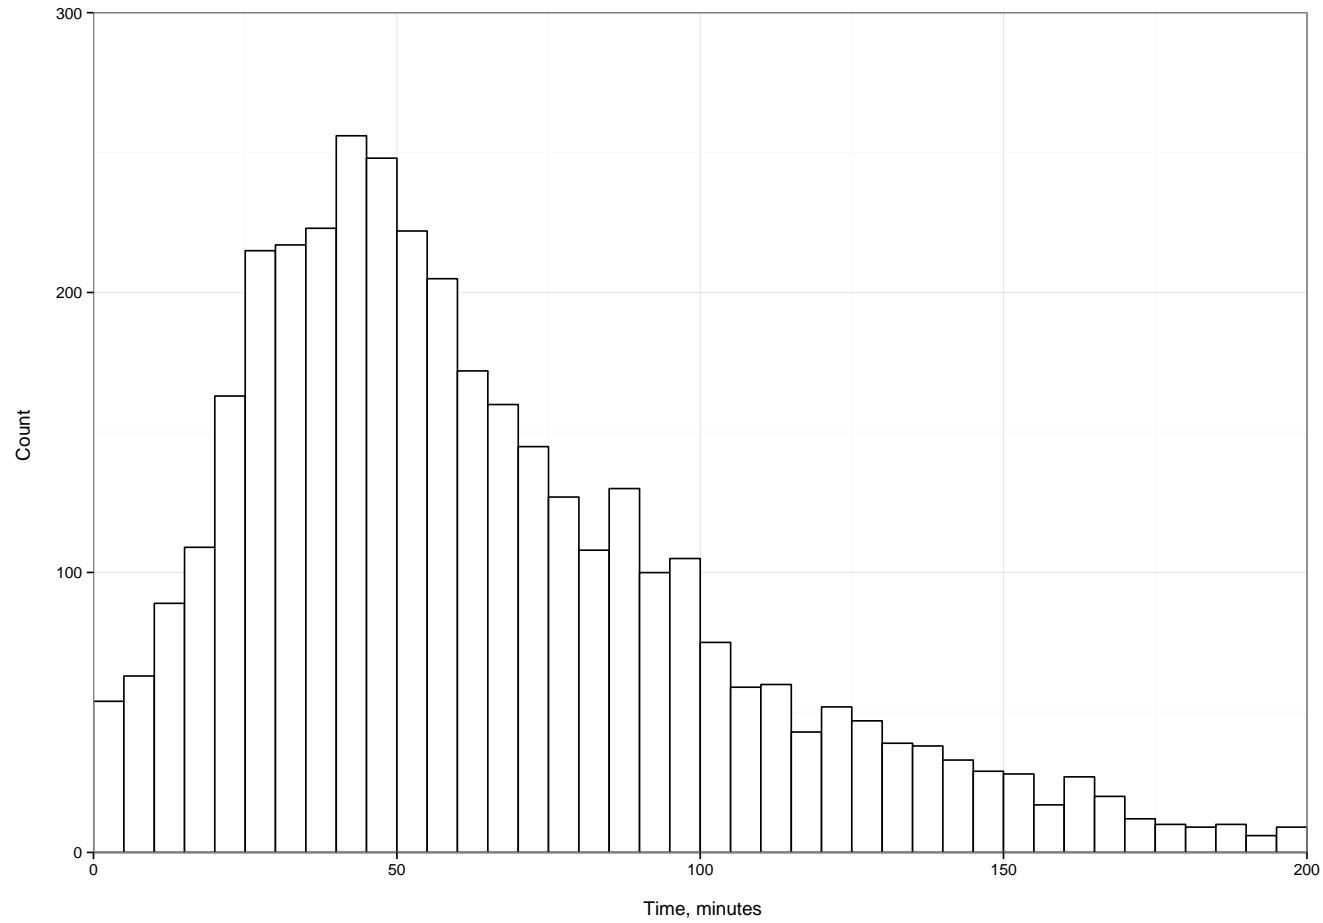

Supplement: mmc1.pdf [file mmc1.pdf]
